# Supplementary material for: Polyphenols fromPrunus mume: extraction, purification, and anticancer activity
Source: Royal Society of Chemistry journal article supplement (doi:10.1039/d3fo01211e), 2023-01-01
Supplement: d3fo01211e1.pdf [file d3fo01211e1.pdf]

## Supplementary material

### **Polyphenols from *Prunus mume*: extraction, purification and anticancer activity**

**Fengyi Zhao<sup>a</sup>, Lanlan Du<sup>b</sup>, Jialuan Wang<sup>a</sup>, Hongxia Liu<sup>a</sup>, Huifang Zhao<sup>a</sup>, Lianfei Lyu<sup>a</sup>, Weifan Wang<sup>c</sup>, Wenlong Wu<sup>a\*</sup>, Weilin Li<sup>b\*</sup>**

<sup>a</sup>Fruit Research Center, Institute of Botany, Jiangsu Province and Chinese Academy of Sciences, Nanjing 210014, PR China

<sup>b</sup>Co-Innovation Center for the Sustainable Forestry in Southern China, College of Forestry, Nanjing Forestry University, Nanjing 210037, PR China

<sup>c</sup>College of Chemical Engineering, Nanjing Forestry University, Nanjing 210037, PR China

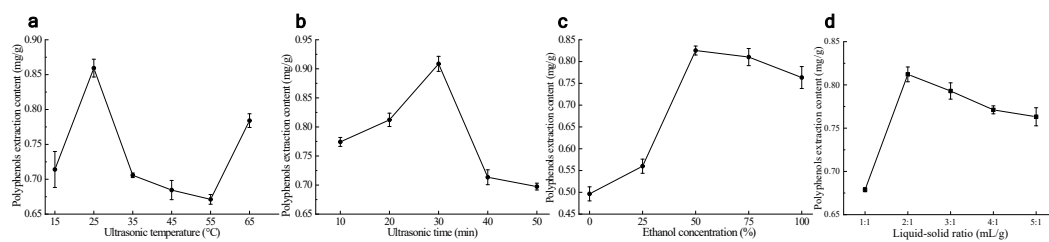

**Fig. S1** Effect on the extraction of polyphenols from *Prunus mume*: a. ultrasonic temperature; b. ultrasonic time; c. ethanol concentration; d. liquid-solid ratio.

**Table S1** Response surface design arrangement and experimental results

| Number | Level |       |     |           | Extract content / (mg/g) |
|--------|-------|-------|-----|-----------|--------------------------|
|        | A/°C  | B/min | C/% | D/(mL/mg) |                          |
| 1      | 25    | 30    | 75  | 3         | 0.4325                   |
| 2      | 35    | 30    | 50  | 3         | 0.4024                   |
| 3      | 25    | 20    | 25  | 2         | 0.3961                   |
| 4      | 25    | 20    | 50  | 1         | 0.3493                   |
| 5      | 35    | 30    | 25  | 2         | 0.3796                   |
| 6      | 35    | 30    | 75  | 2         | 0.4300                   |
| 7      | 25    | 30    | 50  | 2         | 0.5006                   |
| 8      | 35    | 30    | 50  | 1         | 0.3459                   |
| 9      | 25    | 30    | 50  | 2         | 0.5057                   |
| 10     | 15    | 40    | 50  | 2         | 0.4013                   |
| 11     | 25    | 20    | 50  | 3         | 0.3988                   |
| 12     | 25    | 30    | 75  | 1         | 0.3617                   |
| 13     | 15    | 20    | 50  | 2         | 0.4175                   |
| 14     | 25    | 30    | 50  | 2         | 0.5102                   |
| 15     | 25    | 40    | 75  | 2         | 0.4219                   |
| 16     | 25    | 30    | 25  | 3         | 0.4014                   |
| 17     | 25    | 30    | 50  | 2         | 0.5147                   |
| 18     | 25    | 40    | 50  | 3         | 0.4419                   |
| 19     | 25    | 20    | 75  | 2         | 0.4239                   |
| 20     | 35    | 40    | 50  | 2         | 0.3800                   |
| 21     | 15    | 30    | 50  | 3         | 0.4321                   |
| 22     | 15    | 30    | 25  | 2         | 0.4082                   |
| 23     | 15    | 30    | 50  | 1         | 0.3429                   |
| 24     | 35    | 20    | 50  | 2         | 0.4139                   |
| 25     | 25    | 40    | 50  | 1         | 0.3153                   |
| 26     | 25    | 40    | 25  | 2         | 0.3928                   |
| 27     | 15    | 30    | 75  | 2         | 0.4299                   |
| 28     | 25    | 30    | 25  | 1         | 0.3519                   |
| 29     | 25    | 30    | 50  | 2         | 0.4985                   |

**Animal ethics proof of Nanjing Ramda  
Pharmaceutical Co., LTD**

|                                                    |                                                                                                                                                                                                                                                                                        |                                                                                                                                                           |                                                                                                                             |
|----------------------------------------------------|----------------------------------------------------------------------------------------------------------------------------------------------------------------------------------------------------------------------------------------------------------------------------------------|-----------------------------------------------------------------------------------------------------------------------------------------------------------|-----------------------------------------------------------------------------------------------------------------------------|
| <b>Application Date:</b><br>02/06/2022             | <b>Acceptance Number:</b> 202206.01                                                                                                                                                                                                                                                    | <b>Approval Number:</b><br>IACUC-20220612                                                                                                                 |                                                                                                                             |
| <b>Experiment Title</b>                            | Efficacy test of the compound on human hepatocellular carcinoma HepG-2 cell transplanted tumor in nude mice                                                                                                                                                                            |                                                                                                                                                           |                                                                                                                             |
| <b>Experiment Goal</b>                             | To investigate the effect of the compound on human hepatocellular carcinoma HepG-2 cell transplanted tumor in nude mice                                                                                                                                                                |                                                                                                                                                           |                                                                                                                             |
| <b>Project Sources</b>                             | Institute of Botany, Jiangsu Province and Chinese Academy of Sciences                                                                                                                                                                                                                  |                                                                                                                                                           |                                                                                                                             |
| <b>Project Leader</b>                              | Fengyi Zhao                                                                                                                                                                                                                                                                            | <b>Tel</b>                                                                                                                                                | 13701580481                                                                                                                 |
| <b>Experiment Leader</b>                           | Jun Feng                                                                                                                                                                                                                                                                               | <b>Tel</b>                                                                                                                                                | 19962096401                                                                                                                 |
| <b>Department</b>                                  | Research Reagents and Technical Services Department                                                                                                                                                                                                                                    |                                                                                                                                                           |                                                                                                                             |
| <b>Animal Experimental Facility Use License No</b> |                                                                                                                                                                                                                                                                                        | SYXK(Su)2017-0040                                                                                                                                         |                                                                                                                             |
| <b>Experiment Time</b>                             | 12/06/2022-12/08/2022                                                                                                                                                                                                                                                                  |                                                                                                                                                           |                                                                                                                             |
| <b>Animal Information</b>                          | <b>Animal Origin</b>                                                                                                                                                                                                                                                                   | Shanghai Slack Laboratory Animal Co. LTD                                                                                                                  | <b>Fitness Certification</b><br><input type="checkbox"/> No <input checked="" type="checkbox"/> Yes                         |
|                                                    | <b>Variety Strain</b>                                                                                                                                                                                                                                                                  | <input type="checkbox"/> Rat _____<br><input checked="" type="checkbox"/> Mouse <u>BALB/C</u><br><u>nude mice</u><br><input type="checkbox"/> Other _____ | <b>Level</b><br><input type="checkbox"/> Clean<br><input checked="" type="checkbox"/> SPF<br><input type="checkbox"/> Other |
| <b>Other Information</b>                           | Animal Euthanasia Methods: CO <sub>2</sub> anesthesia                                                                                                                                                                                                                                  |                                                                                                                                                           |                                                                                                                             |
|                                                    | Audit result:<br><br><div style="display: flex; justify-content: space-around; align-items: center;">  <div style="text-align: right;"> <p><i>Jun Feng</i></p> <p>Date: 2022.8.15</p> </div> </div> |                                                                                                                                                           |                                                                                                                             |
